# Supplementary material for: Erectile Dysfunction in Patients with Sleep Apnea – A Nationwide Population-Based Study
Source: PubMed Central journal article supplement (PMC4503619; doi:10.1371/journal.pone.0132510), 2015-07-15
Supplement: pone.0132510.s001.pdf [file pone.0132510.s001.pdf]

# Erectile Dysfunction in Patients with Sleep Apnea – A Nationwide Population-Based Study

## Supporting Information

### S1 File

#### Authors:

Chia-Min Chen<sup>1¶</sup>, Ming-Ju Tsai<sup>1,2,3¶</sup>, Po-Ju Wei<sup>1¶</sup>, Yu-Chung Su<sup>4,5</sup>, Chih-Jen Yang<sup>1,2,4,5</sup>,  
Meng-Ni Wu<sup>3,6</sup>, Chung-Yao Hsu<sup>3,5,6</sup>, Shang-Jyh Hwang<sup>7,8</sup>, Inn-Wen Chong<sup>1,9</sup>, Ming-Shyan  
Huang<sup>1,2,5,10\*</sup>

<sup>1</sup> Division of Pulmonary and Critical Care Medicine, Department of Internal Medicine, Kaohsiung Medical University Hospital, Kaohsiung Medical University, Kaohsiung, Taiwan

<sup>2</sup> Graduate Institute of Medicine, College of Medicine, Kaohsiung Medical University, Kaohsiung, Taiwan

<sup>3</sup> Sleep Disorders Center, Kaohsiung Medical University Hospital, Kaohsiung Medical University, Kaohsiung, Taiwan

<sup>4</sup> Department of Internal Medicine, Kaohsiung Municipal Ta-Tung Hospital, Kaohsiung Medical University, Kaohsiung, Taiwan

<sup>5</sup> School of Medicine, College of Medicine, Kaohsiung Medical University, Kaohsiung, Taiwan

<sup>6</sup> Department of Neurology, Kaohsiung Medical University Hospital, Kaohsiung Medical University, Kaohsiung, Taiwan

<sup>7</sup> Division of Nephrology, Department of Internal Medicine, Kaohsiung Medical University Hospital, Kaohsiung Medical University, Kaohsiung, Taiwan

<sup>8</sup> Department of Renal Care, College of Medicine, Kaohsiung Medical University, Kaohsiung, Taiwan

<sup>9</sup> Department of Respiratory Care, College of Medicine, Kaohsiung Medical University, Kaohsiung, Taiwan

<sup>10</sup> Division of Geriatrics and Gerontology, Department of Internal Medicine, Kaohsiung Medical University Hospital, Kaohsiung Medical University, Kaohsiung, Taiwan

¶ These authors contributed equally to this work.

\* Corresponding author

E-mail: shyan310@gmail.com (MSH)

**Table A. Diagnostic codes used for identifying sleep apnea.**

| <b>ICD-9-CM code</b> | <b>Diagnosis</b>                                       |
|----------------------|--------------------------------------------------------|
| 327.20               | Organic sleep apnea, unspecified                       |
| 327.21               | Primary central sleep apnea                            |
| 327.23               | Obstructive sleep apnea (adult)(pediatric)             |
| 327.27               | Central sleep apnea in conditions classified elsewhere |
| 327.29               | Other organic sleep apnea                              |
| 780.51               | Insomnia with sleep apnea, unspecified                 |
| 780.53               | Hypersomnia with sleep apnea, unspecified              |
| 780.57               | Unspecified sleep apnea                                |

**Table B. Multivariable Cox regression analysis of the factors contributing to erectile dysfunction (reduced models of study arm A).**

|                                                                      | Reduced model 1              | Reduced model 2              | Reduced model 3              | Reduced model 4              | Reduced model 5              | Reduced model 6              | Reduced model 7              | Reduced model 8              |
|----------------------------------------------------------------------|------------------------------|------------------------------|------------------------------|------------------------------|------------------------------|------------------------------|------------------------------|------------------------------|
| <b>SA patients vs. Control subjects</b>                              | 1.8 [1.5-2.2] <sup>***</sup> | 1.9 [1.6-2.3] <sup>***</sup> | 1.9 [1.6-2.4] <sup>***</sup> | 1.9 [1.6-2.3] <sup>***</sup> | 1.8 [1.5-2.2] <sup>***</sup> | 1.6 [1.3-2.0] <sup>***</sup> | 1.7 [1.4-2.1] <sup>***</sup> | 1.8 [1.5-2.2] <sup>***</sup> |
| <b>Age &gt; 50 vs. Age ≤ 50</b>                                      | 3.0 [2.7-3.3] <sup>***</sup> | 2.8 [2.5-3.1] <sup>***</sup> | 2.8 [2.6-3.1] <sup>***</sup> |                              | 2.5 [2.2-2.7] <sup>***</sup> | 2.6 [2.3-2.9] <sup>***</sup> | 2.4 [2.2-2.7] <sup>***</sup> | 2.4 [2.2-2.7] <sup>***</sup> |
| <b>Residency (Northern Taiwan vs. Other areas)</b>                   | 1.4 [1.3-1.5] <sup>***</sup> |                              |                              |                              |                              | 1.4 [1.3-1.6] <sup>***</sup> |                              |                              |
| <b>Higher income (&gt; NT\$24000) vs. lower income (≤ NT\$24000)</b> | 1.4 [1.3-1.6] <sup>***</sup> |                              |                              |                              |                              | 1.4 [1.3-1.6] <sup>***</sup> |                              |                              |
| <b>Heart disease (with vs. without)</b>                              | 0.8 [0.6-1.1]                | 0.8 [0.6-1.1]                | 0.8 [0.6-1.1]                | 1.3 [0.9-1.8]                |                              |                              |                              |                              |
| <b>Major neurological disorder (with vs. without)</b>                | 1.2 [1.0-1.4]                | 1.1 [0.9-1.3]                |                              |                              |                              |                              |                              |                              |
| <b>Any comorbidity (CCI score ≥1 vs. = 0)</b>                        |                              |                              |                              |                              | 1.5 [1.3-1.6] <sup>***</sup> |                              |                              |                              |
| <b>Diabetes mellitus (with vs. without)</b>                          |                              |                              |                              |                              |                              | 1.5 [1.3-1.7] <sup>***</sup> | 1.4 [1.2-1.7] <sup>***</sup> | 1.5 [1.3-1.8] <sup>***</sup> |
| <b>Hypertension (with vs. without)</b>                               |                              |                              |                              |                              |                              | 1.3 [1.1-1.4] <sup>***</sup> | 1.2 [1.1-1.4] <sup>**</sup>  | 1.3 [1.1-1.4] <sup>***</sup> |
| <b>Liver diseases (with vs. without)</b>                             |                              |                              |                              |                              |                              | 1.5 [1.3-1.7] <sup>***</sup> | 1.5 [1.3-1.7] <sup>***</sup> |                              |

Abbreviations: SA = sleep apnea; CCI = Charlson Comorbidity Index.

Data presented are hazard ratio [95% confidence interval].

\* $p < 0.05$ ; \*\* $p < 0.01$ ; \*\*\* $p < 0.0001$

**Table C. Multivariable Cox regression analysis of the factors contributing to erectile dysfunction (reduced models of study arm B).**

|                                                                      | Reduced model 1              | Reduced model 2              | Reduced model 3              | Reduced model 4              | Reduced model 5              | Reduced model 6              | Reduced model 7              | Reduced model 8              |
|----------------------------------------------------------------------|------------------------------|------------------------------|------------------------------|------------------------------|------------------------------|------------------------------|------------------------------|------------------------------|
| <b>SA patients vs. Control subjects</b>                              | 2.2 [1.7-2.9] <sup>***</sup> | 2.4 [1.8-3.2] <sup>***</sup> | 2.4 [1.8-3.2] <sup>***</sup> | 2.4 [1.8-3.2] <sup>***</sup> | 2.1 [1.6-2.8] <sup>***</sup> | 1.9 [1.5-2.6] <sup>***</sup> | 2.1 [1.6-2.8] <sup>***</sup> | 2.2 [1.6-2.9] <sup>***</sup> |
| <b>Age &gt; 50 vs. Age ≤ 50</b>                                      | 2.7 [2.3-3.1] <sup>***</sup> | 2.5 [2.2-3.0] <sup>***</sup> | 2.6 [2.2-3.0] <sup>***</sup> |                              | 2.2 [1.9-2.6] <sup>***</sup> | 2.2 [1.9-2.6] <sup>***</sup> | 2.1 [1.8-2.5] <sup>***</sup> | 2.1 [1.8-2.5] <sup>***</sup> |
| <b>Residency (Northern Taiwan vs. Other areas)</b>                   | 1.4 [1.2-1.6] <sup>***</sup> |                              |                              |                              |                              | 1.4 [1.2-1.6] <sup>***</sup> |                              |                              |
| <b>Higher income (&gt; NT\$24000) vs. lower income (≤ NT\$24000)</b> | 1.3 [1.1-1.5] <sup>**</sup>  |                              |                              |                              |                              | 1.3 [1.1-1.5] <sup>**</sup>  |                              |                              |
| <b>Heart disease (with vs. without)</b>                              | 1.1 [0.7-1.7]                | 1.1 [0.7-1.6]                | 1.1 [0.7-1.8]                | 1.7 [1.1-2.6] <sup>*</sup>   |                              |                              |                              |                              |
| <b>Major neurological disorder (with vs. without)</b>                | 1.5 [1.2-2.0] <sup>**</sup>  | 1.4 [1.1-1.9] <sup>*</sup>   |                              |                              |                              |                              |                              |                              |
| <b>Any comorbidity (CCI score ≥1 vs. = 0)</b>                        |                              |                              |                              |                              | 1.9 [1.6-2.2] <sup>***</sup> |                              |                              |                              |
| <b>Diabetes mellitus (with vs. without)</b>                          |                              |                              |                              |                              |                              | 1.7 [1.4-2.1] <sup>***</sup> | 1.7 [1.4-2.1] <sup>***</sup> | 1.8 [1.4-2.5] <sup>***</sup> |
| <b>Hypertension (with vs. without)</b>                               |                              |                              |                              |                              |                              | 1.5 [1.3-1.8] <sup>***</sup> | 1.5 [1.3-1.8] <sup>***</sup> | 1.5 [1.3-1.8] <sup>***</sup> |
| <b>Liver diseases (with vs. without)</b>                             |                              |                              |                              |                              |                              | 1.4 [1.1-1.7] <sup>**</sup>  | 1.4 [1.2-1.7] <sup>**</sup>  |                              |

Abbreviations: SA = sleep apnea; CCI = Charlson Comorbidity Index.

Data presented are hazard ratio [95% confidence interval].

\* $p < 0.05$ ; \*\* $p < 0.01$ ; \*\*\* $p < 0.0001$

**Table D. Sensitivity analyses.**

| Sensitivity analyses                            | Control cohort |     |          |     | SA cohort |    |         |     | Crude IRR [95% CI]           | Adjusted IRR [95% CI]        | aHR [95% CI]                 |
|-------------------------------------------------|----------------|-----|----------|-----|-----------|----|---------|-----|------------------------------|------------------------------|------------------------------|
|                                                 | N              | ED  | PY       | IR  | N         | ED | PY      | IR  |                              |                              |                              |
| <b>Study arm A (suspected SA vs. control A)</b> |                |     |          |     |           |    |         |     |                              |                              |                              |
| Analysis_A1                                     | 48100          | 405 | 186732.8 | 2.2 | 4810      | 82 | 18605.7 | 4.4 | 2.0 [1.9-2.2] <sup>***</sup> | 1.8 [1.6-1.9] <sup>***</sup> | 1.8 [1.4-2.3] <sup>***</sup> |
| Analysis_A2                                     | 39790          | 285 | 142629.5 | 2.0 | 3979      | 64 | 14193.4 | 4.5 | 2.3 [2.1-2.4] <sup>***</sup> | 2.0 [1.8-2.2] <sup>***</sup> | 2.0 [1.5-2.6] <sup>***</sup> |
| Analysis_A3                                     | 32490          | 197 | 106214.9 | 1.9 | 3249      | 44 | 10573.8 | 4.2 | 2.2 [2.0-2.5] <sup>***</sup> | 1.8 [1.7-2.0] <sup>***</sup> | 1.8 [1.3-2.6] <sup>**</sup>  |
| Analysis_A4                                     | 25760          | 132 | 76616.0  | 1.7 | 2576      | 34 | 7633.5  | 4.5 | 2.6 [2.3-2.9] <sup>***</sup> | 2.4 [2.1-2.6] <sup>***</sup> | 2.4 [1.6-3.5] <sup>***</sup> |
| Analysis_A5                                     | 19650          | 89  | 53850.9  | 1.7 | 1965      | 22 | 5368.0  | 4.1 | 2.5 [2.2-2.8] <sup>***</sup> | 2.3 [2.1-2.6] <sup>***</sup> | 2.3 [1.4-3.7] <sup>**</sup>  |
| <b>Study arm B (probable SA vs. control B)</b>  |                |     |          |     |           |    |         |     |                              |                              |                              |
| Analysis_B1                                     | 19330          | 148 | 72992.2  | 2.0 | 1933      | 40 | 7247.9  | 5.5 | 2.7 [2.4-3.0] <sup>***</sup> | 2.2 [2.0-2.5] <sup>***</sup> | 2.2 [1.6-3.2] <sup>***</sup> |
| Analysis_B2                                     | 16090          | 97  | 55160.4  | 1.8 | 1609      | 32 | 5465.2  | 5.9 | 3.3 [3.0-3.7] <sup>***</sup> | 2.9 [2.5-3.2] <sup>***</sup> | 2.9 [1.9-4.4] <sup>***</sup> |
| Analysis_B3                                     | 13040          | 75  | 40456.2  | 1.9 | 1304      | 22 | 4007.6  | 5.5 | 3.0 [2.6-3.4] <sup>***</sup> | 2.5 [2.1-2.8] <sup>***</sup> | 2.4 [1.5-4.0] <sup>**</sup>  |
| Analysis_B4                                     | 10010          | 54  | 28595.3  | 1.9 | 1001      | 15 | 2844.6  | 5.3 | 2.8 [2.4-3.3] <sup>***</sup> | 2.7 [2.3-3.2] <sup>***</sup> | 2.7 [1.5-5.0] <sup>**</sup>  |
| Analysis_B5                                     | 7370           | 32  | 19811.2  | 1.6 | 737       | 10 | 1975.3  | 5.1 | 3.1 [2.6-3.7] <sup>***</sup> | 2.5 [2.1-3.0] <sup>***</sup> | 2.5 [1.2-5.2] <sup>*</sup>   |

Sensitivity analyses:

Analysis\_A1-A5: After excluding the subjects having events in the initial 1-5 years of the follow-up period, the sensitivity analyses were performed on the remaining suspected SA patients and ten randomly-selected corresponding control A subjects with the new follow-up periods starting from 1-5 years after the index dates.

Analysis\_B1-B5: After excluding the subjects having events in the initial 1-5 years of the follow-up period, the sensitivity analyses were performed on the remaining probable SA patients and ten randomly-selected corresponding control B subjects with the new follow-up periods starting from 1-5 years after the index dates.

The adjusted IRRs were calculated by multivariable analyses adjusting for age, residency, income and the presence of various comorbidities.

The adjusted hazard ratios (aHRs) of sleep apnea were calculated by multivariable analyses adjusting for age, residency, income and the presence of various comorbidities.

\* $p < 0.05$ ; \*\* $p < 0.01$ ; \*\*\* $p < 0.0001$

Abbreviation: SA = sleep apnea; CCI = Charlson Comorbidity Index;

N = number of patients; ED = number of patients with erectile dysfunction; PY = total patient-years;

IR = incident rate, as expressed as ED incidence per 1000 patient-years; IRR = incidence rate ratio; CI = confidence interval.
